# Supplementary material for: Syntheses, structures, electrochemical and optical properties of four transition metal complexes based on the 1-triazolyl-3-benzimidazolyltriazene ligand
Source: Royal Society of Chemistry journal article supplement (doi:10.1039/c5ra21057g), 2016-01-01
Supplement: c5ra21057g1.pdf [file c5ra21057g1.pdf]

# Syntheses, structures, electrochemical and optical properties of four transition metal complexes based on the 1-triazolyl- 3-benzimidazolyltriazene ligand

Yanxuan Qiu, Yu Miao, Zizhou Wang, Zhixin Li, Zhijian OuYang, Liu Yang, Wenning Lin,  
Weijin Feng and Wen Dong\*

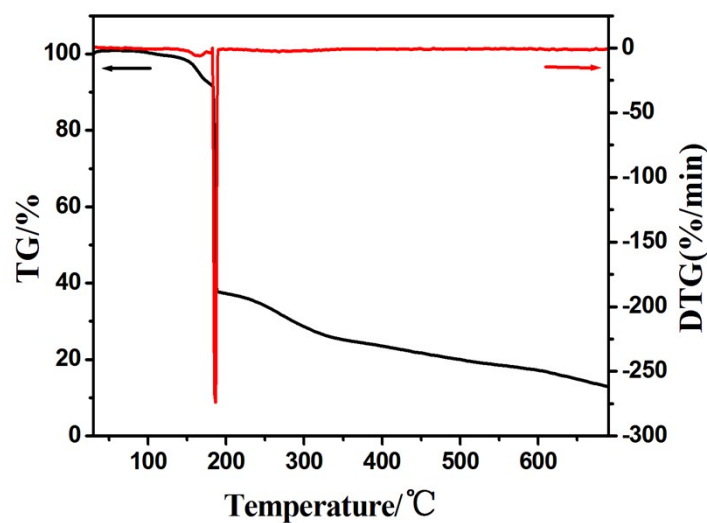

Fig. S1 Thermal gravimetric analyses (TGA) curve for H<sub>3</sub>TBIT.

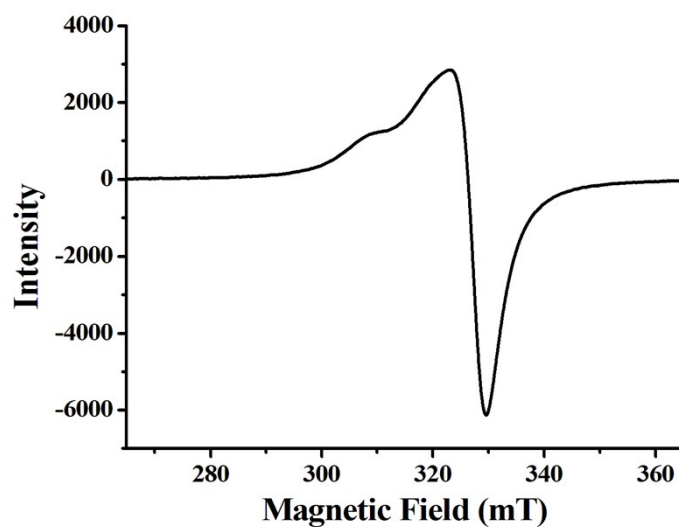

Fig. S2 EPR spectrum for complex **2** in solid state at room temperature (freq. = 9451.508 MHz, power = 0.998 mW, sweep time = 1.0 min).

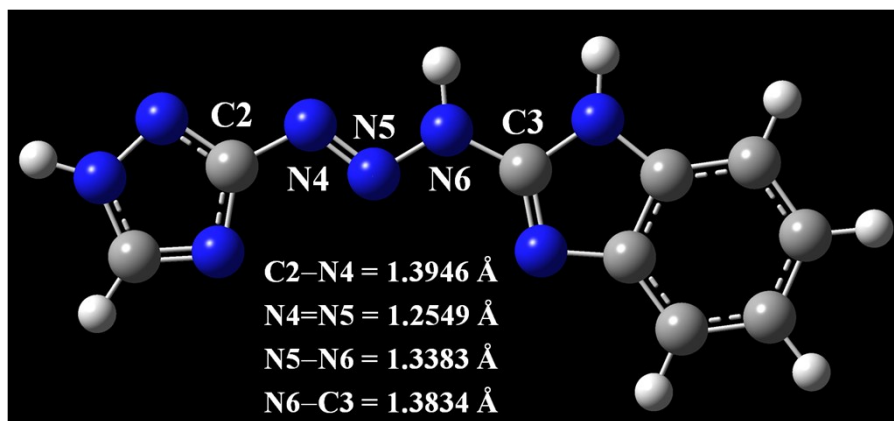

**Fig. S3** The calculated structure of H<sub>3</sub>TBIT using Gaussian09 suite at B3LYP/6-311++G(d,p) level in ground state.

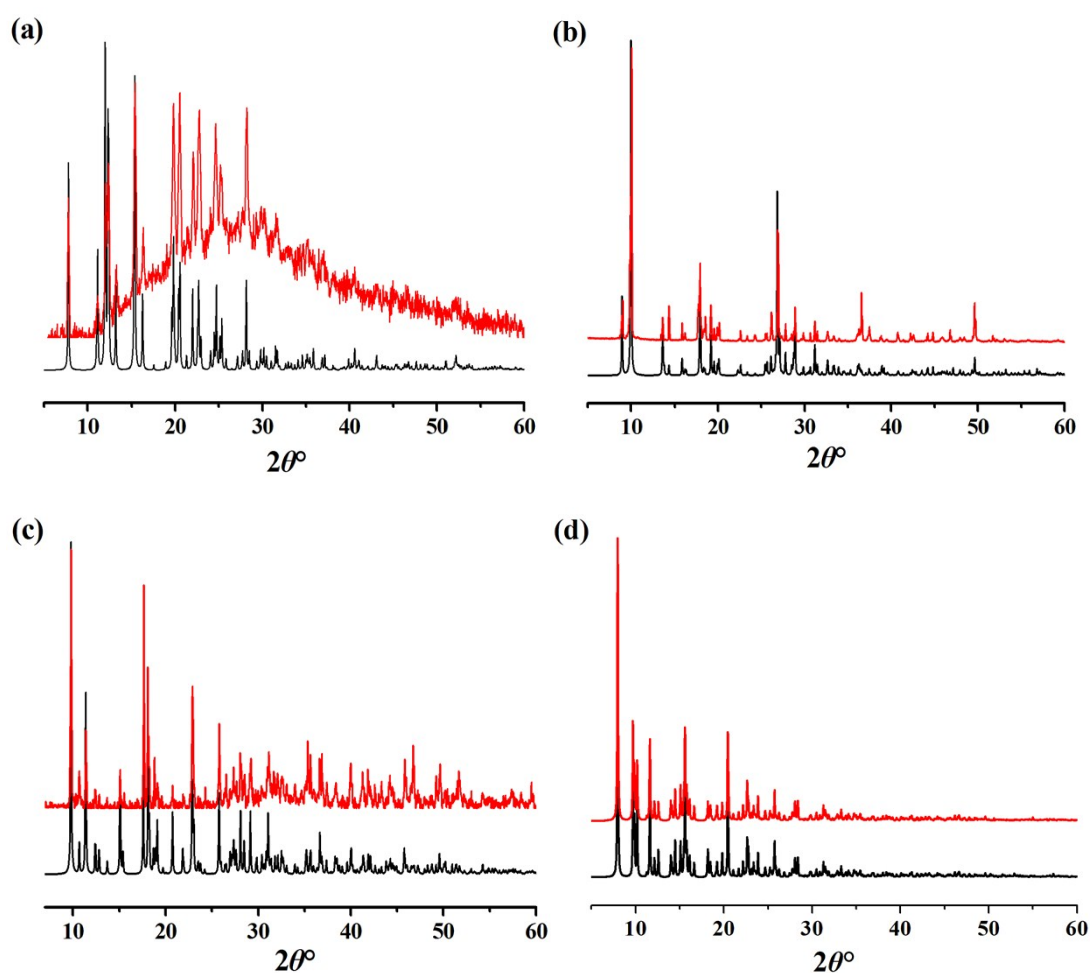

**Fig. S4** Simulated (black) and experimental (red) XRPD patterns for compounds **1**(a), **2**(b), **3**(c) and **4**(d).
